# Supplementary material for: A new strategy to exploit maximum rate performance for aqueous batteries through a judicious selection of MOF-type electrodes
Source: Royal Society of Chemistry journal article supplement (doi:10.1039/d3ra03187j), 2023-01-01
Supplement: d3ra03187j1.pdf [file d3ra03187j1.pdf]

## Supporting Information

### **A New Strategy to Exploit Maximum Rate Performance for Aqueous Battery**

#### **Through a Judicious Selection of MOF-type Electrode**

*Kosuke Nakamoto,<sup>\*a</sup> Junwen Bai,<sup>b</sup> Minyan Zhao,<sup>b</sup> Ryo Sakamoto,<sup>a</sup> Liwei Zhao,<sup>a</sup>*

*Masato Ito,<sup>\*a</sup> Shigeto Okada,<sup>\*a</sup> Eiji Yamamoto,<sup>c</sup> Haruno Murayama,<sup>c</sup> and Makoto Tokunaga<sup>c</sup>*

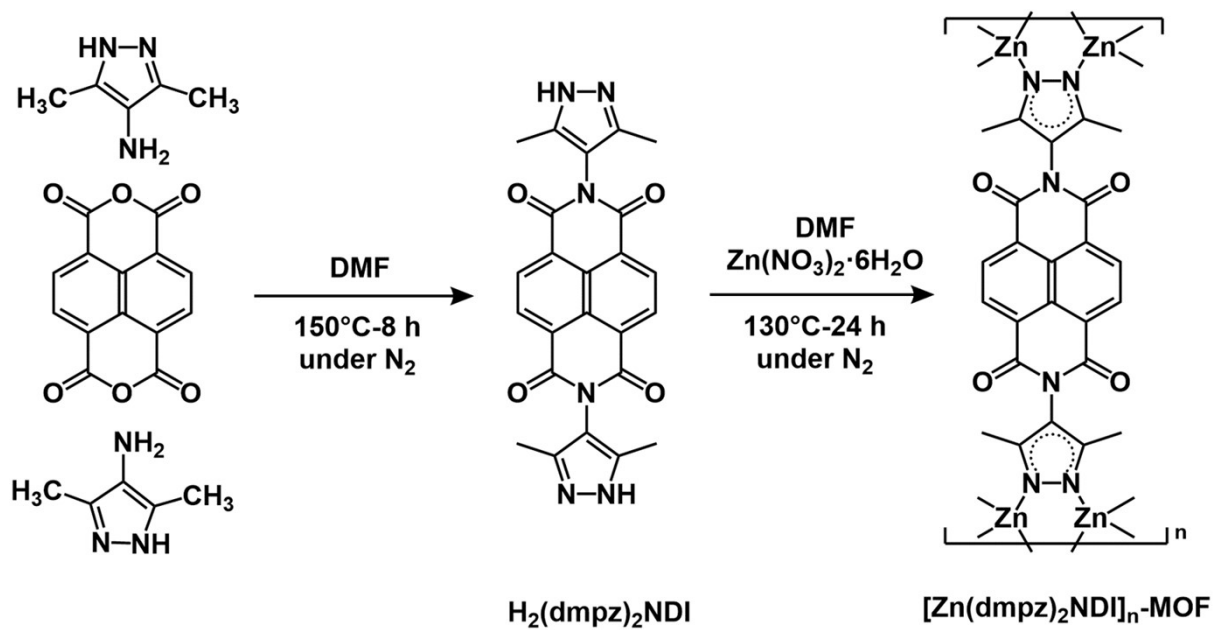

Scheme S1 Preparation of  $\text{H}_2(\text{dmpz})_2\text{NDI}$  and  $[\text{Zn}(\text{dmpz})_2\text{NDI}]_n\text{-MOF}$ .<sup>20</sup>

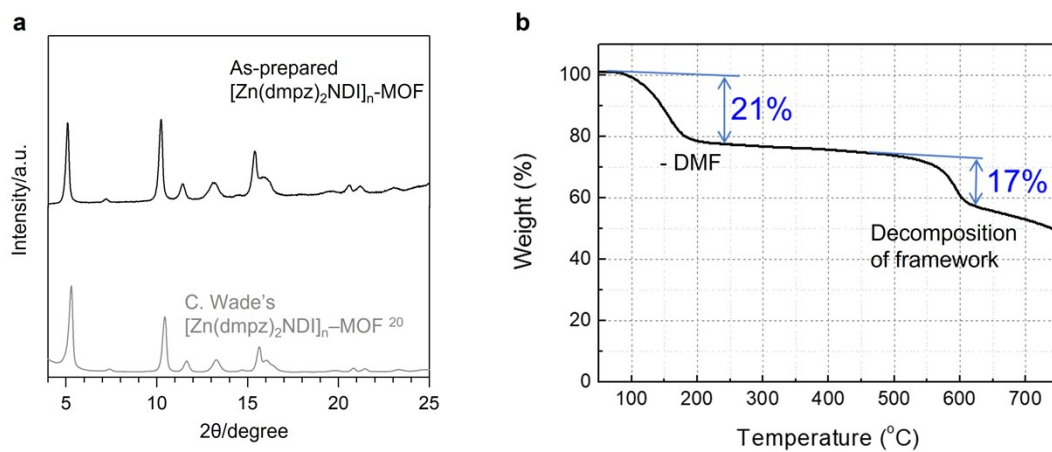

Fig. S1 (a) XRD pattern and (b) TG curve of as-prepared  $[\text{Zn}(\text{dmpz})_2\text{NDI}]_n\text{-MOF}$ .

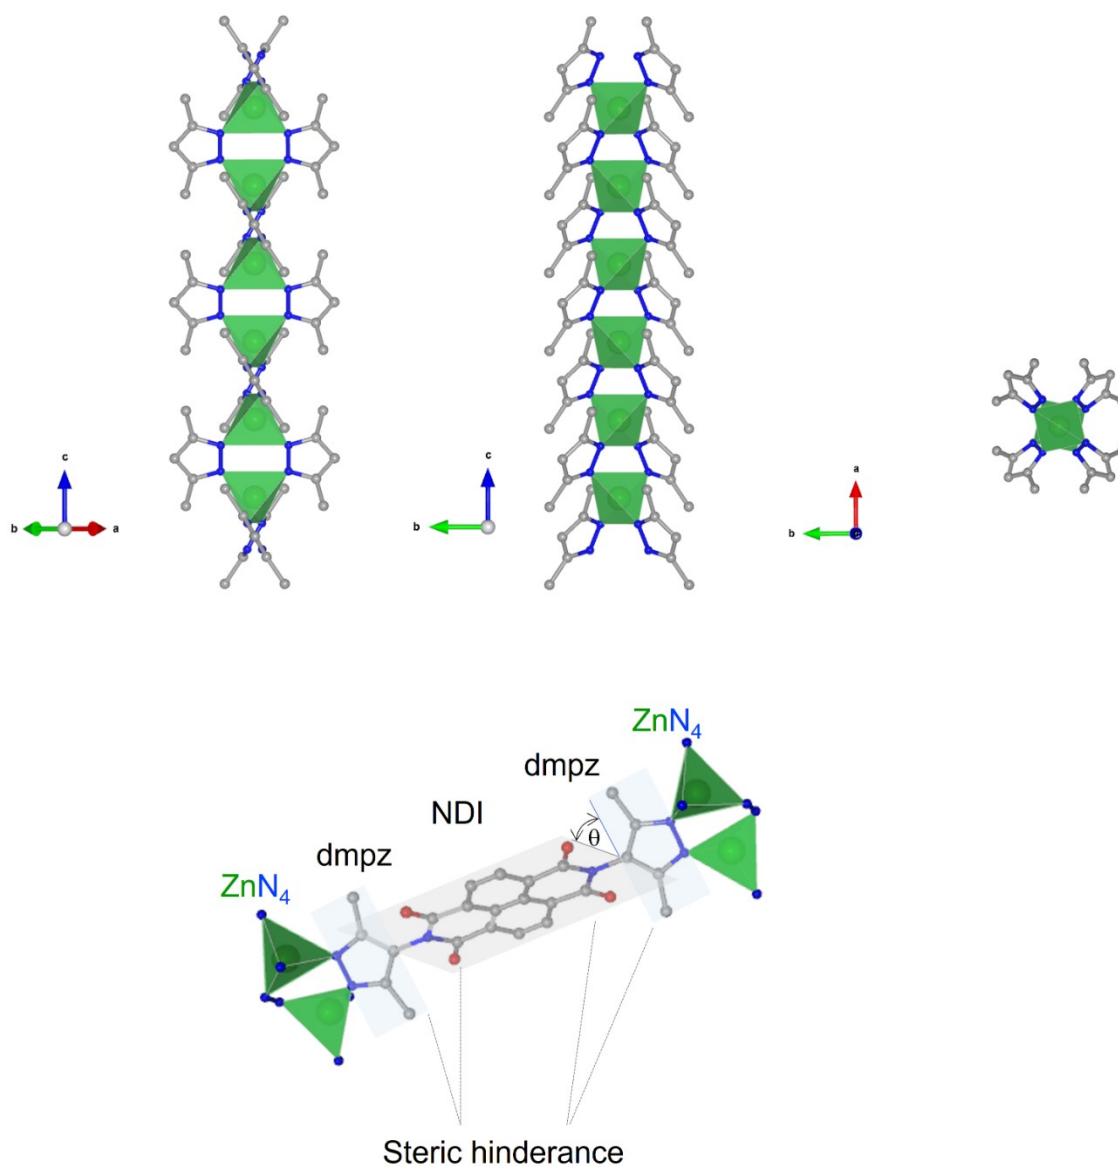

Fig. S2 Clipped local structure for  $[\text{Zn}(\mu\text{-pyrazolate})_2]_n$  chain (upper) and orthogonal planes of dmpz and NDI in the  $[\text{Zn}(\text{dmpz})_2\text{NDI}]_n$ -MOF (lower).

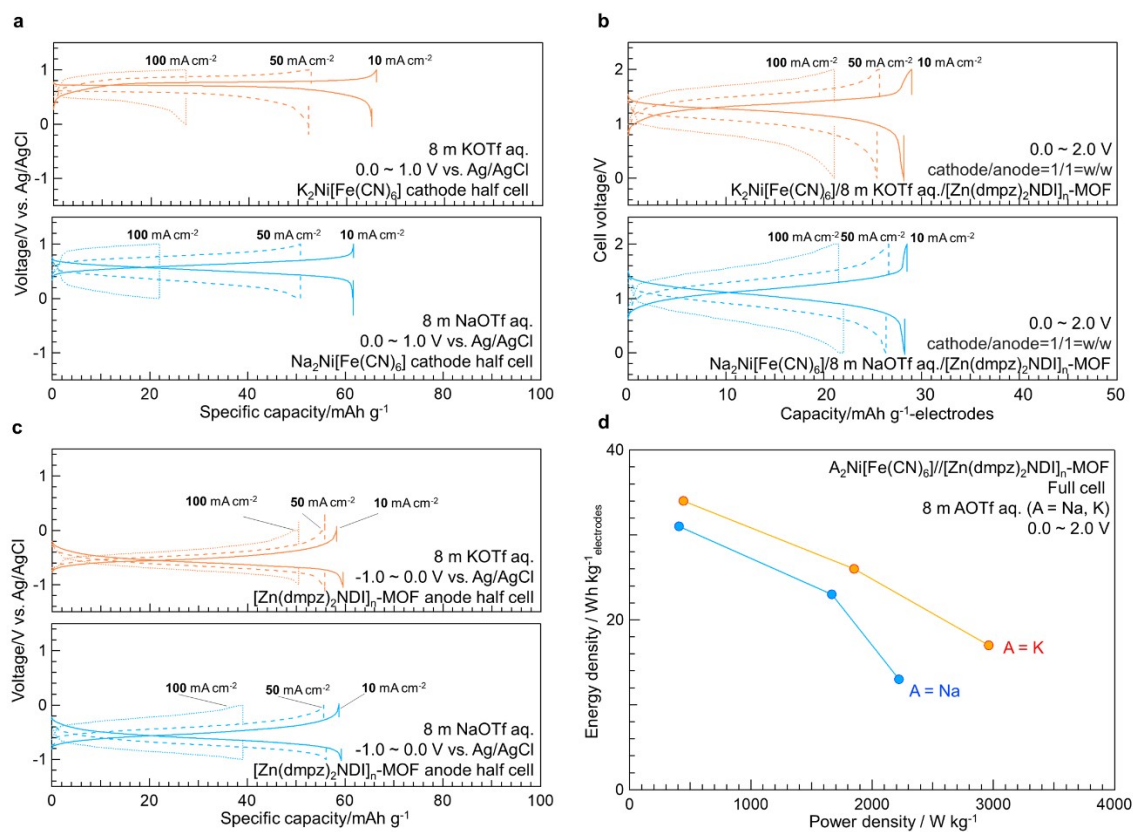

Fig. S3 Charge/discharge profiles of (a)  $A_2Ni[Fe(CN)_6]$ , (c)  $[Zn(dmpz)_2NDI]_n-MOF$ , and (b) their full-cell in 8 m AOTf aq. (upper; A = K, lower; A = Na) with varying current density (10, 50, 100 mA cm<sup>-2</sup>), respectively. (d) Ragone plots of full-cell in 8 m AOTf aq.

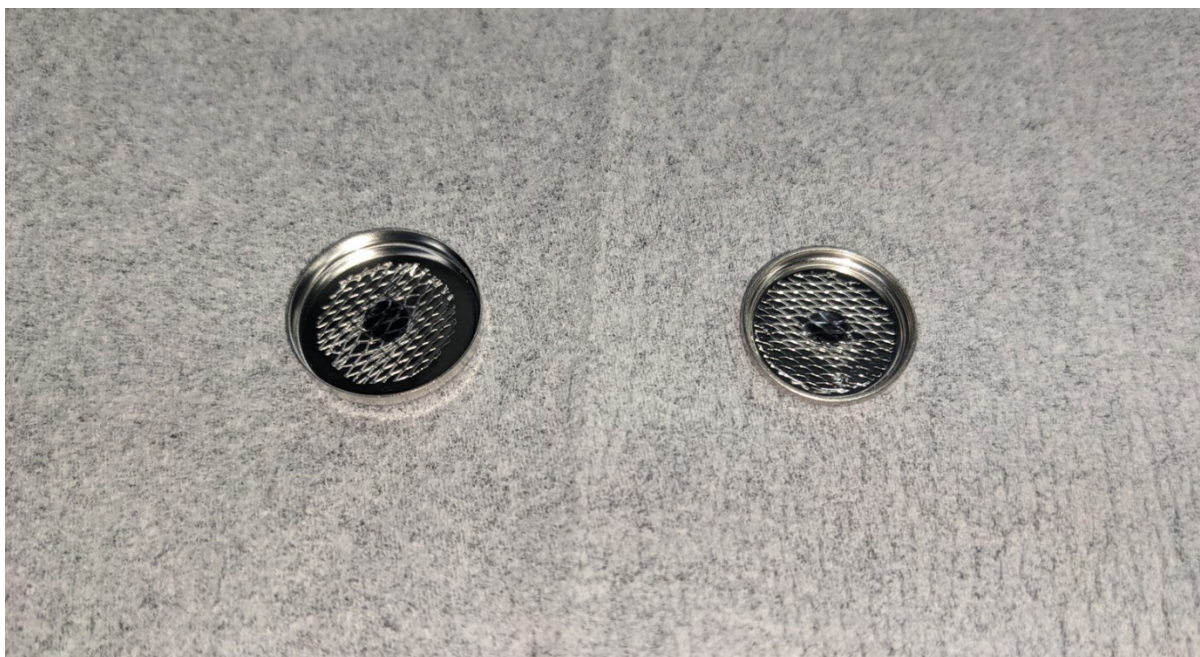

Fig. S4 Photo image of electrode pellets crimped to mesh current collector and coin-type cell parts.

## **Author Contributions**

K. Nakamoto, M. Ito, and S. Okada designed the project. J. Bai and M. Zhao performed the synthesis and electrochemical measurements. R.

Sakamoto and L. Zhao carried out the structural characterization. K. Nakamoto, M. Ito, and S. Okada prepared the manuscript. All authors

participated in the discussion of experimental results.
